# Supplementary material for: Difluoromethylornithine (DFMO), an Inhibitor of Polyamine Biosynthesis, and Antioxidant N-Acetylcysteine Potentiate Immune Response in Mice to the Recombinant Hepatitis C Virus NS5B Protein
Source: MDPI journal article supplement (doi:10.3390/ijms22136892), 2021-06-26
Supplement: s1 [file s1]

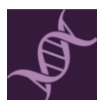

Article

# Difluoromethylornithine (DFMO), an inhibitor of polyamine biosynthesis, and an antioxidant N-acetylcysteine potentiate immune response in mice to the recombinant hepatitis C virus NS5B protein

Ekaterina I. Lesnova <sup>1</sup>, Olga V. Masalova <sup>1,\*</sup>, Kristina Yu. Permyakova <sup>1,3</sup>, Vyacheslav V. Kozlov <sup>1</sup>, Tatyana N. Nikolaeva <sup>1</sup>, Alexander V. Pronin <sup>1</sup>, Vladimir T. Valuev-Elliston <sup>2</sup>, Alexander V. Ivanov <sup>2,\*</sup> and Alla A. Kushch <sup>1</sup>

- <sup>1</sup> Gamaleya National Research Center of Epidemiology and Microbiology, Ministry of Health of the Russian Federation, Moscow 123098, Russia; wolf252006@yandex.ru (E.I.L.); ol.mas@mail.ru (O.V.M.); kristusha164@mail.ru (K.Y.P.); hyperslava@yandex.ru (V.V.K.); tatyananik.55@mail.ru (T.N.N.); proninaalexander@yandex.ru (A.V.P.); vitallku@mail.ru (A.A.K.)
- <sup>2</sup> Center for Precision Genome Editing and Genetic Technologies for Biomedicine, Engelhardt Institute of Molecular Biology, Russian Academy of Sciences, Moscow 119991, Russia; aivanov@yandex.ru (A.V.I.); gansfaust@mail.ru (V.T.V.-E.)
- <sup>3</sup> Federal State Budgetary Educational Institution of Higher Education "Moscow State Academy of Veterinary Medicine and Biotechnology - MVA by K.I. Skryabin", Moscow 109472, Russia; kristusha164@mail.ru (K.Y.P.)
- \* Correspondence: ol.mas@mail.ru (O.V.M.); aivanov@yandex.ru (A.V.I.); Tel.: +7-499-190-30-49 (O.V.M.); +7-199-135-60-65 (A.V.I.)

**Table S1.** The immune response of mice to HCV NS5B when administered in a mixture with compounds.

| Group   | Anti-NS5B antibody titers  |             | Lymphocyte proliferation, SI | IFN- $\gamma$ secretion, pg/mL |
|---------|----------------------------|-------------|------------------------------|--------------------------------|
|         | IgG1                       | IgG2a       |                              |                                |
| saline  | 700 $\pm$ 280 <sup>1</sup> | 35 $\pm$ 28 | 1.8 $\pm$ 0.2 <sup>2</sup>   | 430 $\pm$ 225 <sup>2</sup>     |
| NAC     | 790 $\pm$ 490              | 54 $\pm$ 35 | 1.9 $\pm$ 0.2                | 471 $\pm$ 173                  |
| DFMO    | 857 $\pm$ 420              | 49 $\pm$ 29 | 1.7 $\pm$ 0.3                | 527 $\pm$ 164                  |
| Control | 15 $\pm$ 8                 | 11 $\pm$ 13 | 1.4 $\pm$ 0.9                | 20 $\pm$ 15                    |

Each group (5 mice) received the recombinant protein HCV NS5B at a dose of 4  $\mu$ g/mice during three injections with two-week interval. NS5B was injected intraperitoneally in saline or in combination with NAC and DFMO at the dose 4 mg/mice. Humoral and cellular immunity was examined on days 9 after the third immunization. <sup>1</sup> Values show the geometric mean titer  $\pm$  SD or <sup>2</sup> mean  $\pm$  SD of fore measurements done from one experiment

**Table S2.** Relative content of T lymphocytes and dendritic cells in the splenocytes of mice immunized with recombinant HCV NS5B protein.

| Group   | Th CD4+        | CTL CD8+      | DC CD11c+     |
|---------|----------------|---------------|---------------|
| saline  | 11.5 $\pm$ 1.7 | 3.8 $\pm$ 0.3 | 3.5 $\pm$ 0.3 |
| NAC     | 12.4 $\pm$ 0.6 | 4.1 $\pm$ 0.2 | 4.2 $\pm$ 0.1 |
| DFMO    | 10.5 $\pm$ 1.6 | 3.7 $\pm$ 0.2 | 3.9 $\pm$ 0.3 |
| CpG     | 11.9 $\pm$ 0.4 | 4.4 $\pm$ 0.5 | 4.2 $\pm$ 0.3 |
| Control | 12.1 $\pm$ 1.7 | 3.9 $\pm$ 0.4 | 3.9 $\pm$ 0.5 |

Each group (5 mice) received the recombinant protein HCV NS5B at a dose of 4  $\mu$ g/mice during three injections with two-week interval. NS5B was injected subcutaneously in combination with saline or CpG, whereas NAC and DFMO – with drinking water. Splenocytes from the immunized mice were stained with anti-CD4, anti-CD8, and anti-CD11c antibodies and analyzed by flow cytometry. Values are means  $\pm$  SD (in the percentages) of three independent analyses, and each of them was performed in triplicate.
